# Supplementary material for: Differential sensitivity to pro-oxidant exposure in two populations of killifish (Fundulus heteroclitus)
Source: Springer Nature journal article supplement (doi:10.1007/s10646-012-1033-x), 2013-01-16
Supplement: MOESM2 [file 10646_2012_1033_MOESM2_ESM.docx]

Supplemental material for the paper: Differential sensitivity to pro-oxidant exposure in two populations of killifish (*Fundulus heteroclitus*)

Rachel C. Harbeitner1, Mark E. Hahn1, Alicia R. Timme-Laragy1, 2

1Biology Department, Woods Hole Oceanographic Institution, Woods Hole, MA USA

2Division of Environmental Health, Department of Public Health, School of Public Health and Health Sciences, University of Massachusetts Amherst, Amherst, MA USA

Address correspondence to: Alicia Timme-Laragy ([aliciat@schoolph.umass.edu](mailto:atimmelaragy@whoi.edu)) or Mark Hahn ([mhahn@whoi.edu](mailto:mhahn@whoi.edu))

**Fig. S1** Treatment and population effects on antioxidant gene expression in embryos from New Bedford Harbor (NBH) and Scorton Creek (SC). The expression of *catalase, gclc, gsta, nrf2,* and *sod2* were examined following exposure to 20 mM or 40 mM tBOOH, or untreated water controls, at 7 dpf. Data presented are the mean ± SEM (β-actin-corrected) where *N* = 3 pools of five embryos. Values are normalized to the SC water treatment. There was not a statistically significant difference between the downregulation seen in both the NBH and SC populations.

**
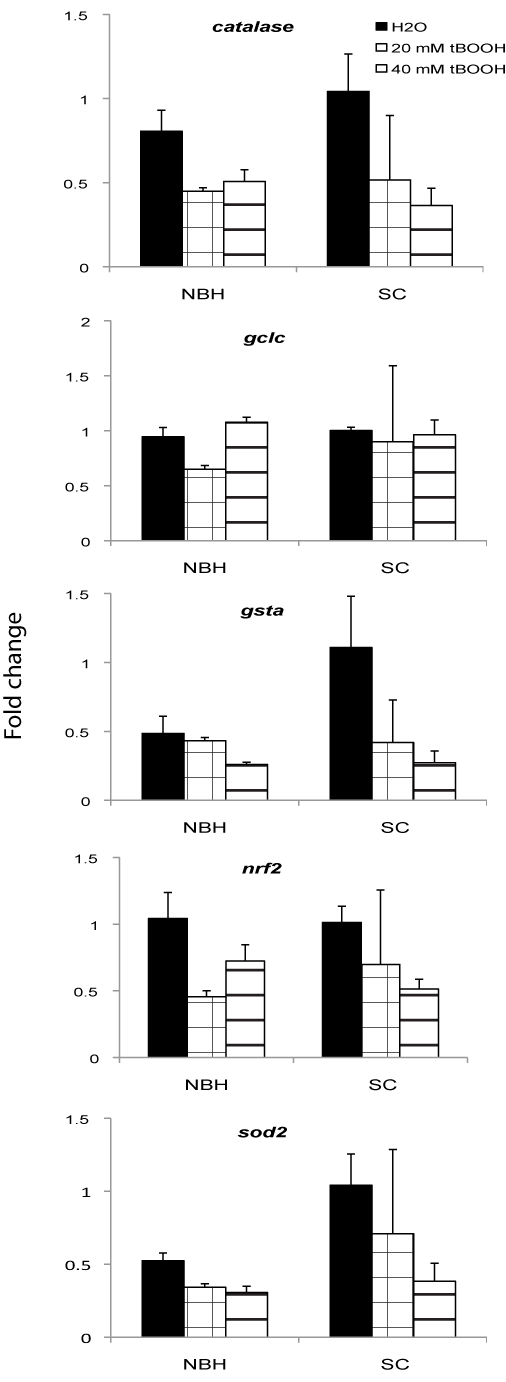
**
